1 **Longitudinal brain structure changes in Parkinson's disease: a replication study**

2

3 **Andrzej Sokolowski<sup>1</sup>, Nikhil Bhagwat<sup>2</sup>, Yohan Chatelain<sup>1</sup>, Mathieu Dugré<sup>1</sup>, Alexandru Hanganu<sup>3</sup>, Oury**

4 **Monchi<sup>4</sup>, Brent McPherson<sup>2</sup>, Michelle Wang<sup>2</sup>, Jean-Baptiste Poline<sup>2</sup>, Madeleine Sharp<sup>2</sup>, Tristan**

5 **Glatard<sup>1\*</sup>**

6

7

8 <sup>1</sup> Department of Computer Science and Software Engineering, Concordia University, Montreal, Canada

9 <sup>2</sup> Department of Neurology and Neurosurgery, McGill University, Montreal, Canada

10 <sup>3</sup> Département de psychologie, Université de Montréal, Montréal, Canada

11 <sup>4</sup> Département de radiologie, radio-oncologie et médecine nucléaire, Université de Montréal, Montréal,

12 Canada

13

14 \* Corresponding author

15 E-mail: [tristan.glatard@concordia.ca](mailto:tristan.glatard@concordia.ca)

16 **Abstract**

17

18 **Context.** An existing major challenge in Parkinson’s disease (PD) research is the identification of  
19 biomarkers of disease progression. While Magnetic Resonance Imaging (MRI) is a potential source of PD  
20 biomarkers, none of the MRI measures of PD are robust enough to warrant their adoption in clinical  
21 research. This study is part of a project that aims to replicate 11 PD studies reviewed in a recent survey  
22 (*JAMA neurology*, 78(10) 2021) to investigate the robustness of PD neuroimaging findings to data and  
23 analytical variations. **Objective.** This study attempts to replicate the results in Hanganu et al. (*Brain*,  
24 137(4) 2014) using data from the Parkinson’s Progression Markers Initiative (PPMI). **Methods.** Using 25  
25 PD subjects and 18 healthy controls, we analyzed the rate of change of cortical thickness and of the  
26 volume of subcortical structures, and we measured the relationship between MRI structural changes and  
27 cognitive decline. We compared our findings to the results in the original study. **Results.** (1) Similarly to  
28 the original study, PD patients with mild cognitive impairment (MCI) exhibited increased cortical  
29 thinning over time compared to patients without MCI in the right middle temporal gyrus, insula, and  
30 precuneus. (2) The rate of cortical thinning in the left inferior temporal and precentral gyri in PD patients  
31 correlated with the change in cognitive performance. (3) There were no group differences in the change of  
32 subcortical volumes. (4) We did not find a relationship between the change in subcortical volumes and the  
33 change in cognitive performance. **Conclusion.** Despite important differences in the dataset used in this  
34 replication study, and despite differences in sample size, we were able to partially replicate the original  
35 results. We produced a publicly available reproducible notebook allowing researchers to further  
36 investigate the reproducibility of the results in Hanganu et al. (2014) when more data becomes available  
37 in PPMI.

38

39 **Introduction**

40

41 Parkinson's disease (PD), one of the most common neurodegenerative diseases, is often characterized by  
42 akinesia, bradykinesia, tremor, and is commonly associated with mild cognitive impairment which  
43 significantly decrease overall quality of life [1]. These symptoms are accompanied by atrophy of the  
44 cortical and subcortical brain structures as well as cortical thinning [2]. As a result, there has been interest  
45 in determining whether MRI measures of atrophy can be used as a biomarker of cognitive decline.  
46 Overall, gray matter atrophy and cortical thinning are present in early PD, while frontal atrophy and  
47 temporoparietal thinning are associated with cognitive impairment in PD [3].  
48  
49 MRI-derived measures of the structural brain changes occurring in PD have emerged as potential  
50 diagnostic and prognostic tools to understand the trajectory of PD. Structural imaging, especially regional  
51 cortical thickness and loss of gray matter volume, has been considered helpful in determining a PD  
52 diagnosis, progression prognosis, and distinguishing PD from other dementias [2]. However, the need to  
53 further investigate the sensitivity, reliability, effect of confounding factors, and overall generalizability of  
54 these progression measures has been highlighted (e.g., [3]) and such rigorous validation is likely a factor  
55 preventing the adoption of MRI measures as outcome measures in PD clinical research.  
56  
57 The replication of neuroimaging findings has been challenged in multiple ways in recent years. For  
58 example, in the study of Botvinik-Nezer et al. [4], 70 independent teams were asked to analyze the same  
59 dataset using the methods of their choice. Results obtained across research teams did not concur on five  
60 out of the nine ex-ante hypotheses, reaching agreement levels ranging from 21% to 37%. Furthermore, the  
61 identification of regional brain atrophy in PD has been of interest as a possible marker of certain  
62 symptoms of PD and of the progression of PD [2]. However, studies conducted in non-PD populations  
63 have shown that estimates of regional volume [5,6] and of cortical thickness vary depending on the  
64 software toolbox [7,8]. Overall, a range of factors matter in the replicability of neuroimaging findings,  
65 including computational environments [9,10], analysis tools and versions [11,12], statistical models [13],  
66 and study populations [14].

67

68 This study is a part of a reproducibility evaluation project that aims to replicate 11 structural MRI  
69 measures of PD reviewed in Mitchel et al. [2]. The goal of the present study is to replicate the work by  
70 Hanganu et al. [15] to test whether prior findings regarding structural MRI-derived PD biomarkers  
71 replicate in a different dataset using similar analytical methods. Hanganu et al. [15] compared the change  
72 of gray matter volume and cortical thinning over time between PD patients with mild cognitive  
73 impairment (PD-MCI), PD patients without mild cognitive impairment (PD-non-MCI), and healthy older  
74 controls (HC); and also tested the relationship between longitudinal structural changes and cognitive  
75 decline in the PD patients. They reported four main findings: (Finding 1) an increased rate of cortical  
76 thinning in PD patients with mild cognitive impairment compared to PD patients without MCI (mainly  
77 affecting the right temporal regions, insula, and inferior frontal gyrus), and compared to healthy controls  
78 (mainly in the right temporal regions and supplementary motor area); (Finding 2) a correlation between  
79 the change in Montreal Cognitive Assessment (MoCA) scores and cortical thinning in the bilateral  
80 temporal lobe, right occipital medial lobe, and the left postcentral gyrus in PD patients; (Finding 3) an  
81 increased loss of the amygdala and nucleus accumbens volumes as well as overall cortical thickness for  
82 the PD-MCI group compared to HC; (Finding 4) a correlation between the change of the right amygdala  
83 and thalamus volumes and the change in MoCA scores in PD patients.

84

85 The results of Hanganu et al. [15] are of clinical interest because they provide insight into the relationship  
86 between structural brain changes and cognitive impairment, thus highlighting possible neural substrates of  
87 PD-related cognitive impairment [16]. Our study addresses the issue of MRI measure replicability,  
88 investigates crucial elements of reporting the study to make it replicable, and discusses the impact of  
89 study design decisions on the replicability. The goal of our study was to attempt to replicate the original  
90 findings using a different cohort. We used open data from the Parkinson's Progression Markers Initiative  
91 (PPMI; [www.ppmi-info.org](http://www.ppmi-info.org)) in order to construct a similar patient cohort as that used in the original  
92 study and we followed the data processing methods and statistical analyses from the original study.

93

## 94 **Methods**

95

### 96 *Participants*

97

98 The original study included 15 PD-non-MCI, 17 PD-MCI and 18 HC. In order to reconstruct this cohort,  
99 PD patients and HC were selected from PPMI to attempt to match the sample size and demographics of the  
100 groups in the original study. The following criteria were used to define the PD cohorts: clinical diagnosis  
101 of PD, available T1-weighted images at two research visits, Hoehn and Yahr stage I and II (the stage was  
102 stable across the two visits for each patient), testing performed at PD OFF state, available MoCA scores,  
103 and the absence of any other neurological condition. Data was collected after approval of the local ethics  
104 committees of the PPMI's participating sites. All participants provided written informed consent. This study  
105 was conducted in accordance with the Declaration of Helsinki and was exempt from the Concordia  
106 University's Research Ethics Unit.

107

108 Patients were divided into PD-MCI and PD-non-MCI groups. In the original study, MCI was diagnosed on  
109 the basis of the presence of subjective complaints of cognitive impairment, objective impairment on two or  
110 more neuropsychological tests in one domain of cognitive function and the absence of dementia. In the  
111 PPMI dataset, patients are already classified as having MCI or not using a very similar criteria for  
112 classification, and thus the existing classification was used. Diagnosis of MCI in the PPMI is determined  
113 based on the following criteria: impairment in at least one cognitive domain, decline from pre-morbid  
114 function, and lack of significant impact of cognitive impairment on daily function.

115

116 Ten PD-MCI ( $M$  age = 67.6;  $SD$  = 5.8), 15 PD-non-MCI ( $M$  age = 63.4;  $SD$  = 9.4), and 18 HC participants  
117 were selected ( $M$  age = 66.9;  $SD$  = 6.1). PD-non-MCI and HC group sample sizes match those of the original  
118 study but an insufficient number of PD-MCI patients were identified in the PPMI dataset that met all the

119 original inclusion criteria, thus our sample is smaller than the original sample (n=10 vs n=17). Descriptive  
 120 statistics are reported in Table 1.

121

122 **Table 1.** Descriptive statistics

|                         | Mean ± SD          |                            |                | p value                     |                     |                         |
|-------------------------|--------------------|----------------------------|----------------|-----------------------------|---------------------|-------------------------|
|                         | PD-MCI<br>(n = 10) | PD-non-<br>MCI (n =<br>15) | HC<br>(n = 18) | PD-MCI<br>vs PD-<br>non-MCI | PD-<br>MCI<br>vs HC | PD-non-<br>MCI vs<br>HC |
| sex (M/F)               | 10/0               | 10/5                       | 15/3           | 1                           | 1                   | 1                       |
| age (y)                 | 67.6 ± 5.8         | 63.4 ± 9.4                 | 66.9 ± 6.1     | 0.21                        | 0.76                | 0.2                     |
| education (y)           | 14.6 ± 2.4         | 14.5 ± 1.9                 | 16.1 ± 2.9     | 0.92                        | 0.17                | 0.66                    |
| Duration Time 2 - 1 (m) | 23.9 ± 9.0         | 19.1 ± 5.4                 | 14.5 ± 2.9     | 0.11                        | < .001              | 0.003                   |
| disease duration        | 4.9 ± 3.3          | 5.1 ± 3.1                  | -              | 0.9                         | -                   | -                       |
| UPDRS III ON (Time 1)   | 20.2 ± 14.3        | 17.7 ± 9.6                 | -              | 0.72                        | -                   | -                       |
| UPDRS III OFF (Time 1)  | 25.2 ± 13.0        | 22.3 ± 10.8                | -              | 0.55                        | -                   | -                       |
| UPDRS III OFF (Time 2)  | 29.3 ± 13.6        | 25.7 ± 11.3                | -              | 0.47                        | -                   | -                       |
| MoCA (Time 1)           | 24.3 ± 1.9         | 25.9 ± 1.8                 | -              | 0.05                        | -                   | -                       |
| MoCA (Time 2)           | 24.5 ± 2.4         | 27.0 ± 1.7                 | -              | 0.006                       | -                   | -                       |

123 Group differences computed with Student's t-test for continuous variables and with  $\chi^2$  test for the  
 124 categorical variable.

125 MCI, Mild Cognitive Impairment; MoCA, Montreal Cognitive Assessment; UPDRS, Unified Parkinson's  
 126 Disease Rating Scale.

127

### 128 *Image acquisition and preprocessing*

129

130 MRI images were taken from the PPMI which uses a standardized study protocol and the following  
 131 parameters: repetition time = 2.3 s, echo time = 2.98 s, inversion time = 0.9 s, slice thickness = 1 mm,  
 132 number of slices = 192, field of view = 256 mm, and matrix size = 256 × 256. However, since PPMI is a  
 133 multisite project there may be slight differences in the sites' setup. Scans were acquired using different 3T  
 134 scanners (Philips Achieva n=2; Siemens Prisma fit n=8; Siemens Prisma n=4; Siemens Skyra n=2; Siemens  
 135 TrioTim n=64; Siemens Verio n=6). There were scans with echo time (TE) that diverged from the

136 standardized protocol: one image with TE = 2.52 s, one image with TE = 1.91 s, three images with TE =  
137 2.91 s, one image with TE = 2.93 s, four images with TE = 2.95 s, four images with TE = 2.96 s, two images  
138 with TE = 3.06s. Additionally, two images had TE = 2.94 s, TR = 6.49 s, and TE = 2.91 s, TR 6.26 s.

139  
140 T1-weighted brain images were processed using FreeSurfer 7.1.1 [17]. The longitudinal preprocessing  
141 stream was used to calculate the change in cortical thinning and subcortical volumes [18]. FreeSurfer's  
142 recon-all function was used for cortical reconstruction. First, all timepoints were processed cross-  
143 sectionally with the default workflow, then an unbiased template from the two timepoints was created for  
144 each subject, finally data was processed longitudinally. Specifically an unbiased within-subject template  
145 space and image [19] is created using robust, inverse consistent registration [20]. Several processing steps,  
146 such as skull stripping, Talairach transforms, atlas registration as well as spherical surface maps and  
147 parcellations are then initialized with common information from the within-subject template, significantly  
148 increasing reliability and statistical power [18]. The rate of change of cortical thickness between the two  
149 timepoints was calculated for each subject. Cortical thickness was smoothed with a 10 mm FWHM kernel.  
150 The original study also reported manual correction of misclassified tissue types, which was not performed  
151 in our study since the protocol for it was insufficient to replicate.

152

### 153 *Statistical analyses*

154

155 Structural brain images and Montreal Cognitive Assessment (MoCA) scores from the initial and the follow-  
156 up visits were analyzed consistently with the 4 main findings reported in the original study. (Finding 1) We  
157 tested vertex-wise differences in the change of cortical thickness between HC, PD-MCI, and PD-non-MCI  
158 groups with an ANCOVA model. (Finding 2) We tested the correlation between the change of cortical  
159 thickness and the change of MoCA scores in PD-MCI, PD-non-MCI, and PD-all (all PD patients) groups.  
160 The time between the two visits was added as a covariate in the general linear models. Cluster-wise p-value  
161 threshold was used at the  $p < .05$  level. The rate of change of the cortical thickness was calculated with the

162 formula: (Thickness at Time 1 – Thickness at Time 2) / (Time 2 – Time 1). Subcortical volumes were  
163 adjusted for the estimated total intracranial volume as well as the averages of the two time points using  
164 regression-based correction, in line with the original study. (Finding 3) We tested the differences in regional  
165 volume changes between the three groups using t-tests and (Finding 4) measured the correlations between  
166 the change in MoCA scores and change of the subcortical volumes and cortical thickness in each group  
167 using Pearson correlation.

168

### 169 *Code availability*

170

171 We used publicly available software to facilitate reproducing our study. Pandas v. 1.5.2 was used to  
172 define the cohort from PPMI data files. FreeSurfer 7.1.1 was used for image preprocessing and vertex-  
173 wise analyses. We used a containerized version of FreeSurfer managed by Boutiques 0.5.25  
174 (doi:10.5281/zenodo.3839009). The containerized FreeSurfer analyses were executed through the Slurm  
175 batch manager on the Narval cluster (<https://docs.alliancecan.ca/wiki/Narval/en>) hosted at Calcul Québec  
176 and part of Digital Research Alliance of Canada.

177

178 The code and results are publicly available at <https://github.com/LivingPark-MRI/hanganu-et-al-2014>.  
179 Data used in the notebook were downloaded directly from the PPMI and cannot be shared publicly due to  
180 its Data Usage Agreements preventing republishing data. We developed a Python package (LivingPark  
181 utils, available at <https://github.com/LivingPark-MRI/livingpark-utils>) to download and manipulate PPMI  
182 data directly from the original PPMI database. As a result, our notebook can be re-executed by anyone  
183 with a PPMI account.

184

### 185 **Results**

186



187 *Vertex-wise results*

188

189 We found numerous group differences in the rate of change of cortical thickness. The results are reported  
190 in Table 2 and Fig. 1.

191

192 *PD-MCI vs. PD-non-MCI.* The two patient groups differed in the rate of cortical thinning. The PD-MCI  
193 group, compared to PD-non-MCI patients, had an increased rate of cortical thinning in the right middle  
194 temporal and precentral gyri as well as right insula. PD-non-MCI group exhibited an increased thinning in  
195 the left precuneus compared to the PD-MCI group.

196

197 *PD-MCI vs. HC.* The HC group had increased cortical thinning in the right precentral and supramarginal  
198 gyri, left superior frontal gyrus, and bilateral superior parietal lobule, compared to the PD-MCI group.

199

200 *PD-non-MCI vs. HC.* The HC group had increased cortical thinning in the right precuneus as well as  
201 precentral and supramarginal gyri compared to the PD-non-MCI group.

202

203 **Table 2.** Vertex-wise group differences in the rate of change of cortical thickness

| Group and region            | Size<br>(mm <sup>2</sup> ) | MNI X | MNI Y | MNI Z | Max     | clusterwise<br><i>p</i> -value |
|-----------------------------|----------------------------|-------|-------|-------|---------|--------------------------------|
| <b>PD-MCI vs PD-non-MCI</b> |                            |       |       |       |         |                                |
| L precuneus                 | 901.62                     | -15.4 | -45.2 | 65.8  | 2.8711  | .0004                          |
| R precentral                | 808.31                     | 45    | -4.9  | 49.8  | -4.3574 | .0026                          |
| R insula                    | 689.83                     | 36.1  | -16.4 | -3.4  | -4.285  | .0066                          |
| R MTG                       | 636.56                     | 42.1  | 7.1   | -37.1 | -4.7243 | .0108                          |
| <b>PD-MCI vs HC</b>         |                            |       |       |       |         |                                |
| L SPL                       | 1596.42                    | -12.2 | -55.4 | 59.9  | 3.4112  | .0002                          |
| L SFG                       | 816.25                     | -8.3  | 35.1  | 34    | 4.2357  | .0006                          |
| R precentral                | 619.04                     | 15    | -12.2 | 61.8  | 2.4693  | .0144                          |
| R supramarginal             | 578.61                     | 37.3  | -29.7 | 39.5  | 3.0369  | .0221                          |
| R SPL                       | 563.81                     | 29.5  | -48.4 | 42.7  | 3.9183  | .0256                          |

**PD-non-MCI vs HC**

|              |         |      |       |      |        |       |
|--------------|---------|------|-------|------|--------|-------|
| R SMG        | 1010.34 | 35.7 | -30.6 | 39.6 | 4.4171 | .0002 |
| R precentral | 580.49  | 43.5 | -9.4  | 46.2 | 3.8495 | .0211 |
| R precuneus  | 537.11  | 8.6  | -71.2 | 40   | 3.6102 | .0384 |

204 HC, healthy controls; Max, maximum  $-\log_{10}(p \text{ value})$  in the cluster; MTG, middle temporal gyrus; PD-  
 205 non-MCI, Parkinson's disease without mild cognitive impairment; PD-MCI, Parkinson's disease with  
 206 mild cognitive impairment; SFG, superior frontal gyrus; SMG, supramarginal gyrus; SPL, superior  
 207 parietal lobule.  
 208

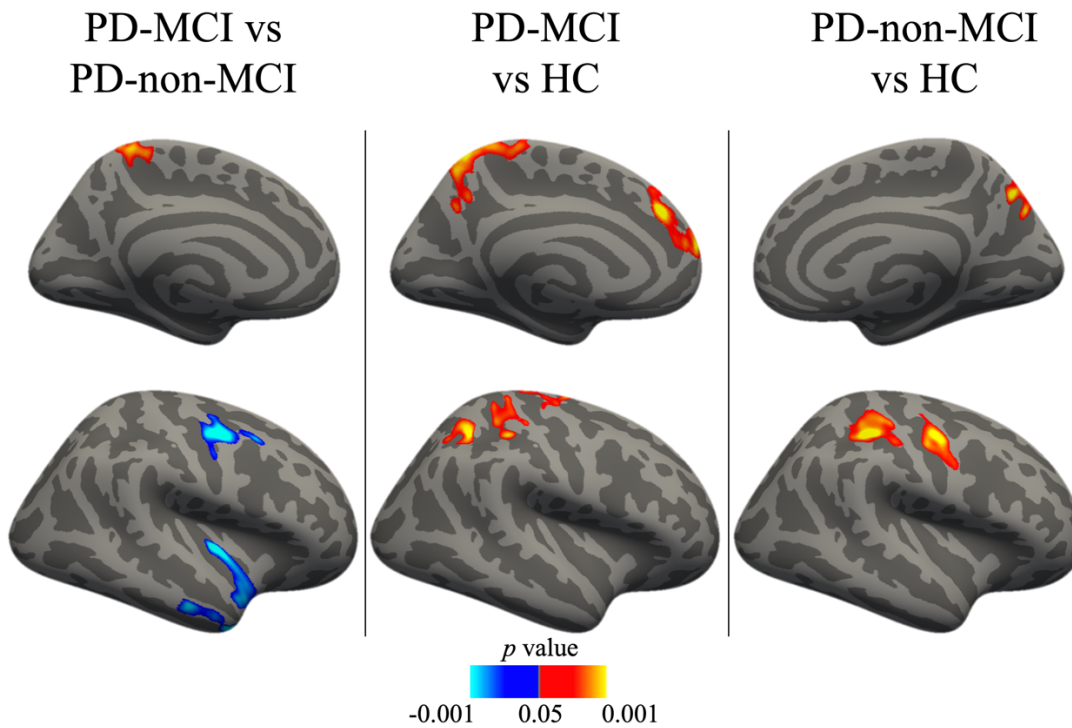

209  
 210 **Fig. 1. Vertex-wise group differences in the rate of change of cortical thickness. Cold colors**  
 211 **represent increased cortical thinning in the first group compared to the second group, warm colors**  
 212 **represent increased cortical thinning in the second group compared to the first group. Results**  
 213 **corrected with the cluster-wise threshold ( $p < .05$ ).**

214 HC, healthy controls; PD-MCI, Parkinson's disease with mild cognitive impairment; PD-non-MCI,  
 215 Parkinson's disease without mild cognitive impairment.

216

217 There was a significant negative correlation between the change in MoCA scores and the rate of change  
 218 of the right middle frontal gyrus thickness in the PD-MCI group ( $p < .05$ ). There was a positive  
 219 correlation between the MoCA and the rate of change of the left inferior temporal and precentral gyri  
 220 across all PD patients ( $p < .05$ ). The correlations were not significant in the PD-non-MCI group. The  
 221 results are reported in Table 3 and Fig. 2.

222

223 **Table 3.** Vertex-wise correlation between the rate of change of cortical thickness and the change in  
 224 Montreal Cognitive Assessment scores in PD patients

| Group and region | Size<br>(mm <sup>2</sup> ) | MNI<br>X | MNI Y | MNI Z | Max     | clusterwise<br>$p$ -value |
|------------------|----------------------------|----------|-------|-------|---------|---------------------------|
| <b>PD-all</b>    |                            |          |       |       |         |                           |
| L ITG            | 592.67                     | -53.3    | -20.1 | -33.1 | 3.4012  | .0177                     |
| L precentral     | 523.77                     | -24.4    | -16.8 | 64.5  | 2.5887  | .0406                     |
| <b>PD-MCI</b>    |                            |          |       |       |         |                           |
| R rostral MTG    | 749.67                     | 30.1     | 43.1  | 16.9  | -4.0378 | .0004                     |

225 ITG, inferior temporal gyrus; L, left; Max, maximum  $-\log_{10}(p \text{ value})$  in the cluster; MCI, mild cognitive  
 226 impairment; MTG, middle temporal gyrus; R, right.

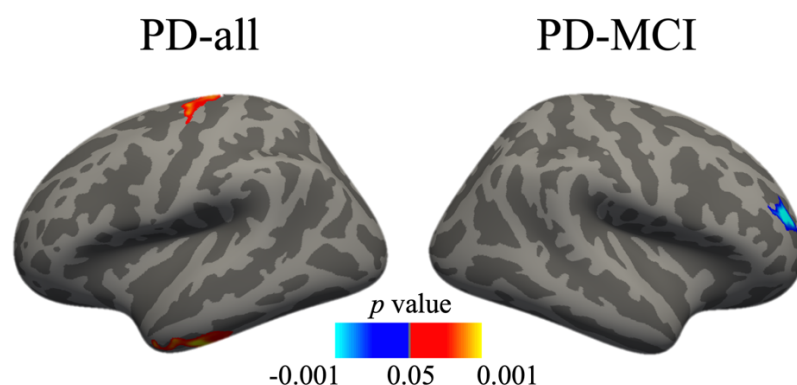

227

228 **Fig. 2.** Vertex-wise correlation between the rate of change of cortical thickness and the change in  
 229 Montreal Cognitive Assessment scores in the PD-all and PD-MCI groups.

230

231 *Volumetric results*

232

233 Group comparisons of the volumetric change of subcortical regions revealed increased decrease of the  
 234 thalamus volume in the PD-MCI group compared to PD-non-MCI ( $p = .01$ ). There was a difference in the  
 235 change of the putamen volume between the PD-non-MCI and HC groups ( $p = .02$ ), with HC exhibiting  
 236 increased thinning. The results are reported in Table 4.

237

238 **Table 4.** Group differences in the volumetric change of the subcortical regions and the overall cortical  
 239 thickness

|      | PD-MCI  |       | PD-non-MCI |       | HC     |       | <i>p</i> values             |                     |                      |
|------|---------|-------|------------|-------|--------|-------|-----------------------------|---------------------|----------------------|
|      | mean    | %     | mean       | %     | mean   | %     | PD-MCI vs<br>PD-non-<br>MCI | PD-<br>MCI vs<br>HC | PD-non-<br>MCI vs HC |
| CoTh | 0.006   | -0.57 | 0          | -0.11 | 0.006  | -0.21 | .44                         | 1                   | .5                   |
| Thal | -223.24 | -2.56 | 210.34     | 1.25  | -51.26 | -0.68 | .01                         | .28                 | .09                  |
| Caud | 36.33   | 0.51  | -12.99     | -0.25 | -9.36  | -0.2  | .63                         | .56                 | .95                  |
| Put  | -16.38  | -0.66 | 115.21     | 1.03  | -86.9  | -0.92 | .21                         | .26                 | .02                  |
| Hipp | -50.43  | -1.76 | 4.56       | -1.14 | 24.22  | -0.49 | .43                         | .22                 | .74                  |
| Amyg | -39.03  | -4.97 | -5.15      | -2.24 | 25.98  | -0.65 | .57                         | .2                  | .5                   |
| Nacc | -9.89   | -1.23 | -3.06      | -0.82 | 8.04   | 0.23  | .81                         | .52                 | .58                  |

240 Subcortical volumes are presented in mm<sup>3</sup>, cortical thickness in mm. Amyg, amygdala; Caud, caudate;

241 CoTh, cortical thickness; Hipp, hippocampus; Nacc, nucleus accumbens; Put, putamen; Thal, thalamus.

242

243 Correlation analysis did not show any significant correlation between the change of MoCA scores and the  
 244 change in volume of subcortical structures. Results are reported in Table 5.

245

246 **Table 5.** Correlation between the rate of change of the subcortical volumes and the change in Montreal  
 247 Cognitive Assessment scores

| Structure  | PD-all   |          | PD-MCI   |          | PD-non-MCI |          |
|------------|----------|----------|----------|----------|------------|----------|
|            | <i>r</i> | <i>p</i> | <i>r</i> | <i>p</i> | <i>r</i>   | <i>p</i> |
| R Thalamus | -0.03    | .89      | 0.09     | .81      | 0.07       | .80      |
| R Caudate  | 0.09     | .68      | -0.18    | .61      | 0.28       | .31      |
| R Putamen  | 0.02     | .92      | 0.14     | .7       | 0.1        | .73      |

|                     |       |     |       |     |       |     |
|---------------------|-------|-----|-------|-----|-------|-----|
| R Pallidum          | 0     | 1   | -0.07 | .84 | 0.33  | .22 |
| R Hippocampus       | -0.1  | .64 | -0.04 | .92 | -0.05 | .85 |
| R Amygdala          | -0.24 | .26 | -0.25 | .48 | -0.27 | .33 |
| R Nucleus accumbens | 0.04  | .87 | 0.38  | .27 | -0.12 | .66 |
| L Thalamus          | 0.19  | .37 | 0.14  | .71 | 0.48  | .07 |
| L Caudate           | 0     | 1   | -0.29 | .42 | 0.42  | .12 |
| L Putamen           | -0.03 | .9  | -0.17 | .63 | 0.19  | .50 |
| L Pallidum          | 0.05  | .81 | 0.02  | .97 | 0.15  | .61 |
| L Hippocampus       | -0.01 | .96 | -0.08 | .82 | 0.07  | .81 |
| L Amygdala          | 0.24  | .26 | 0.32  | .36 | 0.34  | .22 |
| L Nucleus accumbens | 0.02  | .92 | -0.07 | .85 | 0.12  | .67 |

248 L, left; MCI, mild cognitive impairment; PD-non-MCI, Parkinson's disease without mild cognitive  
249 impairment; PD-MCI, Parkinson's disease with mild cognitive impairment; R, right.

250

## 251 Discussion

252

253 This study attempted to replicate the results of Hanganu et al. [15], which focused on the longitudinal  
254 changes in the cortical thickness and subcortical gray matter volume in PD patients. Group differences  
255 between PD patients with and without MCI were investigated along with the relationship between the  
256 structural changes and cognition. We used the analytic methods described in the paper and applied them  
257 to a different dataset of PD patients with and without MCI, and HC.

258

259 We have replicated the differences in the rate of cortical thinning between the PD-MCI and PD-non-MCI  
260 groups (Finding 1 in [15]), which supports the notion that these two patient groups differ in the rate of  
261 neurodegeneration. Patients with MCI had increased cortical thinning of the right MTG and insula, which  
262 overlaps with the regions reported in the original study. However, we did not replicate the group  
263 differences involving the HC group.

264

265 We found a relationship between the decrease in cognitive performance and cortical thinning of the left  
266 precentral gyrus and ITG in PD patients. The ITG cluster partially overlaps with the area reported in the

267 original study. Although the structural changes were not found in the exact same brain voxels, the data  
268 supports the role of the thinning of the temporal regions in PD patients' cognition (Finding 2 in [15]).  
269 Additionally, we found a relationship between the increase of the cognitive performance and cortical  
270 thinning of the right MFG in the PD-MCI group. This result was not reported in the original study and  
271 provides additional insight into potential structural changes in PD populations. Overall, we have  
272 replicated the original vertex-wise results (Findings 1 and 2 in [15]) to a certain extent.

273  
274 Volumetric results (Findings 3 and 4 in [15]) were not replicated. The original study reported group  
275 differences in the change of overall cortical thickness as well as volumes of amygdala and nucleus  
276 accumbens. Instead, we found higher atrophy of thalamus in the PD-MCI compared to PD-non-MCI  
277 group, and higher putamen atrophy in the PD-MCI group compared to HC. Hanganu et al. [15] reported a  
278 correlation between the change in cognitive performance and the change in gray matter volume in the  
279 right thalamus and amygdala in PD patients. We found no significant correlations across all subcortical  
280 regions.

281  
282 There are several factors that may explain the differences between the original results and the results of  
283 our replication. Most importantly, the two studies differ in the sample sizes for the PD-MCI group. We  
284 were unable to select enough PD patients with MCI that met all the inclusion criteria which reduced the  
285 chance to replicate the results. This was troublesome despite the fact that we used PPMI, one of the  
286 largest publicly available PD dataset. PPMI is a relatively new initiative and is lacking much longitudinal  
287 data. Our Jupyter notebook remains accessible and can be re-run as new data becomes available in PPMI.  
288 Importantly, current neuroscience recommends using larger sample sizes to avoid inflation of effect sizes.  
289 Sample sizes used in research are increasing and recent data suggest that brain-wide association studies  
290 may require as many as thousands of participants to define reliable brain-behavior relationships [21].

291

292 Differences between the samples may also affect replicability. There are no established clinical measures  
293 to infer disease severity in the brain, but disease duration, UPDRS score (a measure of symptom severity),  
294 and medication use are sometimes used as proxy measures. Average disease duration was very similar in  
295 our sample compared to the original study suggesting the patients were roughly matched. However, some  
296 patients had not yet started PD medications in our sample whereas all patients in the original study were  
297 already taking dopaminergic medications, and the UPDRS score was also a few points lower in our  
298 sample compared to the original study's sample, both of which suggest that the replication sample we  
299 constructed from the PPMI cohort had slightly milder disease than the sample included in the original  
300 study. Our sample is also slightly older than the original cohort. Furthermore, despite using the same  
301 inclusion criteria as the original study, it is possible that other differences in sample characteristics may  
302 have contributed to the incomplete replication. Conclusions drawn from our data should not be expanded  
303 to different clinical populations (e.g., more severe PD patients).

304  
305 Differences in neuroimaging data acquisition protocols and MRI scanners can also influence replicability.  
306 Data used in our study was acquired using different MRI scanners. Although PPMI uses a standardized  
307 protocol for data acquisition we cannot rule out the possibility that the reported differences may be related  
308 to the variability introduced by using various scanners, even though the vast majority of scans were  
309 acquired with a Siemens scanner. Ideally all participants should be scanned with the same machine but  
310 the benefits of collecting more data in a multisite project outweighs the advantages of a single-stage  
311 acquisition.

312  
313 Software versions may also have impacted the results. FreeSurfer 5.3. for Centos 4 was used in the  
314 original study. This version of FreeSurfer was released 10 years ago and is no longer supported or  
315 recommended, hence we used version 7.1.1. for Centos 7 instead. Although the software version  
316 shouldn't drastically change the clinical results, it is possible that it introduced variability during  
317 preprocessing or during the statistical analysis stage. We used the `mri_glmfit-sim` method to perform the

318 analysis (including cluster correction) while the original study used the QDEC (Query, Design, Estimate,  
319 Contrast) method with mri\_surfcluster. Our method is more stringent but also more reliable. It might have  
320 established more reliable borders between the gray and white matters. Filip et al. [22] reported structural  
321 group differences in data analyzed with FreeSurfer 5.3. which were not replicated with version 7.1.  
322 Previous studies indicated that software version may impact structural brain analyses [7,9]. We will test  
323 the impact of software variability in our future work.

324  
325 We thoroughly followed the original processing pipeline reported by Hanganu et al. [15]. Nevertheless, it  
326 is possible that we have missed some steps which could have influenced the results. We did not perform  
327 manual correction of misclassified brain tissue as this procedure cannot be objectively replicated. This  
328 may have impacted the analysis regarding smaller subcortical structures. There might be slight differences  
329 in the statistical models that we were not aware of. Any of the aforementioned discrepancies from the  
330 original study could have impacted the ability to replicate the results. Once the analyses were conducted,  
331 we contacted the authors of the original study to obtain their feedback, which importantly contributed to  
332 the discussion section.

333  
334 Finally, there is a negative bias in replication studies, coming from the fact that researchers conducting  
335 replications focus on following original methods rather than getting positive results. Therefore, it is  
336 expected that more negative results are reported in replications than in original studies. We encourage  
337 scientists to follow all the steps and details from the original studies instead of simply aiming to replicate  
338 positive results.

339  
340 We encountered multiple challenges while attempting to replicate the study by Hanganu et al. [15].  
341 Analysis details are necessarily limited in the methods section of most papers which left us to infer some  
342 analytic steps. We also had difficulty constructing a similar cohort from publicly available PD data, which  
343 led to some differences in the patient characteristics between the original and replication samples, and to



344 differences in sample size. We have published a Jupyter notebook that the research community can use to  
345 replicate our study. While respecting the PPMI data usage agreement, it clearly defines the criteria to  
346 define the study population (using the Pandas library), the preprocessing pipeline and software version  
347 (through containerized tools), and the statistical model that was used to obtain the results. Our notebook  
348 addresses some of the aforementioned challenges encountered during our study and can be re-run over  
349 time to update the study as more data gets added to PPMI.

350  
351 We continue to investigate the replicability of MRI-derived PD biomarkers by replicating other clinical  
352 studies. Arafe et al. as well as Wang et al. report the results of their work in this Special Collection.

353

#### 354 **Acknowledgment**

355

356 This work was funded by the Michael J. Fox Foundation for Parkinson's Research (MJFF-021134).

357

#### 358 **Author Contributions**

359

360 **Conceptualization:** Tristan Glatard, Jean-Baptiste Poline, Madeleine Sharp

361 **Data Curation:** Andrzej Sokołowski

362 **Formal Analysis:** Andrzej Sokołowski

363 **Funding Acquisition:** Tristan Glatard, Jean-Baptiste Poline, Madeleine Sharp

364 **Investigation:** Andrzej Sokołowski, Jean-Baptiste Poline, Madeleine Sharp, Tristan Glatard

365 **Methodology:** Andrzej Sokołowski, Tristan Glatard

366 **Project Administration:** Tristan Glatard

367 **Resources:** Tristan Glatard

368 **Software:** Andrzej Sokołowski, Mathieu Dugré, Yohan Chatelain, Tristan Glatard

369 **Supervision:** Tristan Glatard

370 **Validation:** Andrzej Sokołowski, Tristan Glatard

371 **Visualization:** Andrzej Sokołowski

372 **Writing - Original Draft Preparation:** Andrzej Sokołowski

373 **Writing - Review & Editing:** Andrzej Sokołowski, Nikhil Bhagwat, Yohan Chatelain, Mathieu Dugré,

374 Alexandru Hanganu, Oury Monchi, Brent McPherson, Michelle Wang, Jean-Baptiste Poline, Madeleine

375 Sharp, Tristan Glatard

376

### 377 **References**

378 1. Grafton ST. Contributions of functional imaging to understanding parkinsonian symptoms.

379 Curr Opin Neurobiol. 2004;14(6):715–9.

380 2. Mitchell T, Lehericy S, Chiu SY, Strafella AP, Stoessl AJ, Vaillancourt DE. Emerging

381 Neuroimaging Biomarkers Across Disease Stage in Parkinson Disease: A Review. JAMA

382 Neurol. 2021;78(10):1262–72.

383 3. Yang J, Burciu RG, Vaillancourt DE. Longitudinal Progression Markers of Parkinson’s

384 Disease: Current View on Structural Imaging. Curr Neurol Neurosci Rep. 2018;18(12):1–

385 11.

386 4. Botvinik-Nezer R, Holzmeister F, Camerer CF, Dreber A, Huber J, Johannesson M, et al.

387 Variability in the analysis of a single neuroimaging dataset by many teams. Nature.

388 2020;582(7810):84–8.

389 5. Gomez-Ramirez J, Quilis-Sancho J, Fernandez-Blazquez MA. A Comparative Analysis of

390 MRI Automated Segmentation of Subcortical Brain Volumes in a Large Dataset of Elderly

391 Subjects. Neuroinformatics. 2022;20(1):63–72.

392 6. Rane S, Plassard A, Landman BA, Claassen DO, Donahue MJ, Initiative for the ADN.

393 Comparison of Cortical and Subcortical Measurements in Normal Older Adults across

394 Databases and Software Packages. J Alzheimers Dis Rep. 2017;1(1):59–70.

- 395 7. Bhagwat N, Barry A, Dickie EW, Brown ST, Devenyi GA, Hatano K, et al. Understanding  
396 the impact of preprocessing pipelines on neuroimaging cortical surface analyses.  
397 *Gigascience*. 2021;10(1):1–13.
- 398 8. Masouleh SK, Eickhoff SB, Zeighami Y, Lewis LB, Dahnke R, Gaser C, et al. Influence of  
399 Processing Pipeline on Cortical Thickness Measurement. *Cerebral Cortex*.  
400 2020;30(9):5014–27.
- 401 9. Gronenschild EHBM, Habets P, Jacobs HIL, Mengelers R, Rozendaal N, van Os J, et al.  
402 The Effects of FreeSurfer Version, Workstation Type, and Macintosh Operating System  
403 Version on Anatomical Volume and Cortical Thickness Measurements. *PLoS One*.  
404 2012;7(6):e38234.
- 405 10. Glatard T, Lewis LB, da Silva RF, Adalat R, Beck N, Lepage C, et al. Reproducibility of  
406 neuroimaging analyses across operating systems. *Front Neuroinform*. 2015;9:12.
- 407 11. Dickie E, Hodge SM, Craddock RC, Poline J, Kennedy DN. Tools Matter: Comparison of  
408 Two Surface Analysis Tools Applied to the ABIDE Dataset. *Res Ideas Outcomes*.  
409 2017;3:13726.
- 410 12. Tustison NJ, Cook PA, Klein A, Song G, Das SR, Duda JT, et al. Large-scale evaluation  
411 of ANTs and FreeSurfer cortical thickness measurements. *Neuroimage*. 2014;99:166–79.
- 412 13. Tan A, Ma W, Vira A, Marwha D, Eliot L. The human hippocampus is not sexually-  
413 dimorphic: Meta-analysis of structural MRI volumes. *Neuroimage*. 2016;124:350–66.
- 414 14. Kennedy DN, Abraham SA, Bates JF, Crowley A, Ghosh S, Gillespie T, et al. Everything  
415 matters: The reponim perspective on reproducible neuroimaging. *Front Neuroinform*.  
416 2019;13:1.
- 417 15. Hanganu A, Bedetti C, Degroot C, Mejia-Constain B, Lafontaine AL, Soland V, et al. Mild  
418 cognitive impairment is linked with faster rate of cortical thinning in patients with  
419 Parkinson’s disease longitudinally. *Brain*. 2014;137(4):1120–9.

- 420 16. Bougea A, Maraki MI, Yannakoulia M, Stamelou M, Xiromerisiou G, Kosmidis MH, et al.  
421 Higher probability of prodromal Parkinson disease is related to lower cognitive  
422 performance. *Neurology*. 2019;92(19):e2261–72.
- 423 17. Fischl B. FreeSurfer. *Neuroimage*. 2012;62(2):774–81.
- 424 18. Reuter M, Schmansky NJ, Rosas HD, Fischl B. Within-subject template estimation for  
425 unbiased longitudinal image analysis. *Neuroimage*. 2012;61(4):1402–18.
- 426 19. Reuter M, Fischl B. Avoiding asymmetry-induced bias in longitudinal image processing.  
427 *Neuroimage*. 2011;57(1):19–21.
- 428 20. Reuter M, Rosas HD, Fischl B. Highly accurate inverse consistent registration: A robust  
429 approach. *Neuroimage*. 2010;53(4):1181–96.
- 430 21. Marek S, Tervo-Clemmens B, Calabro FJ, Montez DF, Kay BP, Hatoum AS, et al.  
431 Reproducible brain-wide association studies require thousands of individuals. *Nature*.  
432 2022;603(7902):654–60.
- 433 22. Filip P, Bednarik P, Eberly LE, Moheet A, Svatkova A, Grohn H, et al. Different  
434 FreeSurfer versions might generate different statistical outcomes in case–control  
435 comparison studies. *Neuroradiology*. 2022;64(4):765–73.
- 436
